# Supplementary material for: Targeted deep sequencing of circulating tumor DNA in metastatic pancreatic cancer
Source: PubMed Central journal article supplement (PMC5788622; doi:10.18632/oncotarget.23330), 2017-12-16
Supplement: oncotarget-09-2076-s001.pdf [file oncotarget-09-2076-s001.pdf]

## Targeted deep sequencing of circulating tumor DNA in metastatic pancreatic cancer

### SUPPLEMENTARY MATERIALS

Supplementary Data File 1: Patient characteristics of the entire study cohort

| ID | Sex | Age (years) | Stage   | Metastases    | Therapy line | Therapy regimen            | PFS (weeks) |
|----|-----|-------------|---------|---------------|--------------|----------------------------|-------------|
| 1  | m   | 64          | UICC IV | HEP           | 1st line     | Gemcitabine/Erlotinib      | 12          |
| 2  | m   | 75          | UICC IV | HEP, LYM, PER | 1st line     | Gemcitabine/Erlotinib      | 22          |
| 3  | w   | 67          | UICC IV | HEP           | 1st line     | Gemcitabine/Erlotinib      | 21          |
| 4  | m   | 72          | UICC IV | HEP           | 1st line     | Gemcitabine/nab-Paclitaxel | 8           |
| 5  | m   | 72          | UICC IV | HEP, PER, OSS | 1st line     | Gemcitabine/nab-Paclitaxel | 19          |
| 6  | m   | 60          | UICC IV | PER           | 1st line     | Gemcitabine/nab-Paclitaxel | 24          |
| 7  | m   | 62          | UICC IV | HEP           | 1st line     | FOLFIRINOX                 | 12          |
| 8  | w   | 79          | UICC IV | HEP           | 1st line     | Gemcitabine/Erlotinib      | 7           |
| 9  | m   | 50          | UICC IV | PUL           | 1st line     | Gemcitabine/Erlotinib      | 15          |
| 10 | m   | 62          | UICC IV | HEP, PER      | 1st line     | FOLFIRINOX                 | 8           |
| 11 | w   | 73          | UICC IV | HEP, PUL      | 1st line     | Gemcitabine/nab-Paclitaxel | 8           |
| 12 | w   | 61          | UICC IV | HEP, PUL      | 2nd line     | FOLFIRINOX                 | 10          |
| 13 | m   | 78          | UICC IV | PUL           | 2nd line     | FOLFIRI                    | 8           |
| 14 | m   | 75          | UICC IV | PUL           | 2nd line     | 5FU/Oxaliplatin            | 24          |
| 15 | m   | 85          | UICC IV | HEP           | 2nd line     | 5FU/Oxaliplatin            | 49          |
| 16 | w   | 44          | UICC IV | HEP           | 2nd line     | Gemcitabine/nab-Paclitaxel | 19          |
| 17 | m   | 59          | UICC IV | HEP           | 2nd line     | Gemcitabine/nab-Paclitaxel | 20          |
| 18 | m   | 73          | UICC IV | HEP           | 2nd line     | Docetaxel/Oxaliplatin      | 31          |
| 19 | m   | 58          | UICC IV | HEP, PER      | 3rd line     | Docetaxel/Oxaliplatin      | 11          |
| 20 | w   | 76          | UICC IV | PER           | 3rd line     | 5FU/Oxaliplatin            | 25          |

UICC = union international contre le cancer, 5FU = 5-Fluorouracil, PFS = progression-free survival.

**Supplementary Data File 2: Detailed molecular data of the entire study cohort**

| ID | Variant                        | Tissue mutated | ctDNA mutated allele frequency (%) |           |          |
|----|--------------------------------|----------------|------------------------------------|-----------|----------|
|    |                                |                | Baseline                           | Treatment | Progress |
| 1  | <i>KRAS</i> G12V (c.35G>T)     | n.a.           | 0.8                                | 2.0       | 0.9      |
|    | <i>KRAS</i> G12V (c.35G>T)     | n.a.           | 11.8                               | 0.8       | 8.0      |
| 2  | <i>TP53</i> P151S (c.451C>T)   | n.a.           | 2.7                                | 0         | 0        |
|    | <i>TP53</i> R110L (c.329G>T)   | n.a.           | 0                                  | 0         | 1.0      |
| 3  | <i>KRAS</i> G12V (c.35G>T)     | yes            | 0                                  | 0         | 0        |
|    | <i>TP53</i> R175H (c.524G>A)   | yes            | 2.0                                | 0         | 0        |
| 4  | <i>KRAS</i> G12D (c.35G>A)     | yes            | 9.0                                | 1.0       | 1.9      |
|    | <i>TP53</i> R282W (c.844C>T)   | yes            | 11.0                               | 0         | 3.0      |
| 5  | <i>KRAS</i> G12D (c.35G>A)     | yes            | 9.0                                | 0         | 1.0      |
|    | <i>TP53</i> G266V (c.797G>T)   | no             | 3.3                                | 0         | 23.6     |
| 6  | <i>SMAD4</i> Q390K (c.1168G>A) | no             | 0                                  | 1.0       | 0        |
|    | <i>KRAS</i> G12D (c.35G>T)     | n.a.           | 3.5                                | 1.0       | 10.0     |
| 7  | <i>TP53</i> N263fs (c.788delA) | n.a.           | 2.8                                | 0         | 8.5      |
|    | <i>KRAS</i> G12V (c.35G>T)     | yes            | 64.0                               | 41.0      | 69.6     |
| 8  | <i>TP53</i> R273H (c.818G>A)   | yes            | 42.0                               | 27.0      | 52.0     |
|    | <i>SMAD4</i> R361H (c.1082G>A) | yes            | 42.0                               | 22.0      | 51.0     |
| 9  | <i>KRAS</i> G12D (c.35G>A)     | yes            | 1.3                                | 0         | 5.6      |
|    | <i>TP53</i> R248Q (c.743G>A)   | yes            | 0                                  | 0         | 2.0      |
| 10 | <i>KRAS</i> G12D (c.35G>A)     | n.a.           | 47.0                               | 7.0       | 8.0      |
| 11 | <i>KRAS</i> G12D (c.35G>A)     | n.a.           | 9.0                                | 6.0       | 1.1      |
| 12 | -                              | n.a.           | -                                  | -         | -        |
| 13 | <i>SMAD4</i> R361H (c.1082G>A) | yes            | 0                                  | 0         | 0        |
| 14 | <i>TP53</i> P72R (c.215C>G)    | yes            | 1.0                                | 1.0       | 1.0      |
|    | <i>KRAS</i> A146V (c.437C>T)   | yes            | 0.39                               | 0         | 1.1      |
| 15 | <i>TP53</i> R175H (c.524G>A)   | yes            | 0                                  | 1.0       | 1.0      |
|    | <i>ATM</i> A3054T (c.9160G>A)  | n.a.           | 0                                  | 4.0       | 4.0      |
| 17 | <i>KRAS</i> G12R (c.34G>C)     | yes            | 0                                  | 0         | 0        |
|    | <i>KRAS</i> G12V (c.35G>T)     | n.a.           | 1.4                                | 0         | 0.8      |
| 18 | <i>TP53</i> H214Y (c.640C>T)   | n.a.           | 1.0                                | 0         | 0        |
|    | <i>KRAS</i> G12V (c.35G>T)     | n.a.           | 2.4                                | 0.3       | 1.9      |
| 19 | <i>TP53</i> F19S (c.56T>C)     | n.a.           | 1.1                                | 0         | 0        |
|    | <i>KRAS</i> G12D (c.35G>A)     | no             | 1.6                                | 0         | 4.0      |
| 20 | <i>TP53</i> R273S (c.817C>A)   | no             | 1.5                                | 0         | 4.4      |

n.a.= not available.
